# Supplementary material
Source: PubMed Central journal article supplement (PMC2268589)

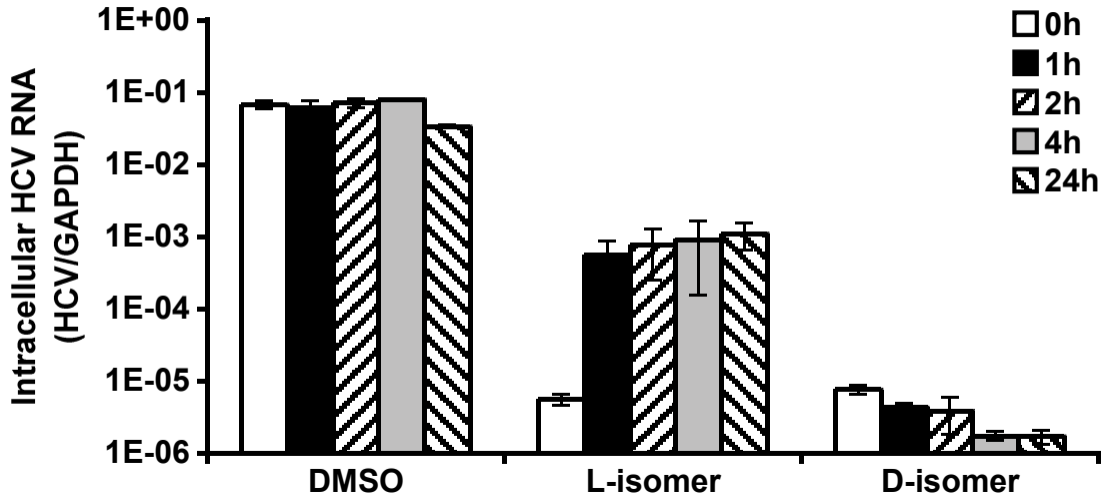

Supplement: pnas_0712380105_1.pdf [file pnas_0712380105_1.pdf]

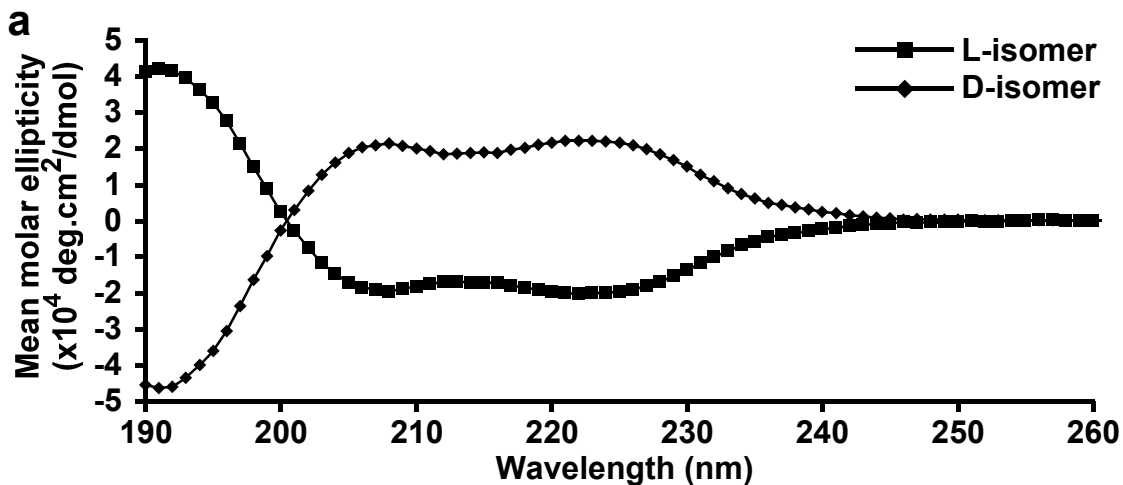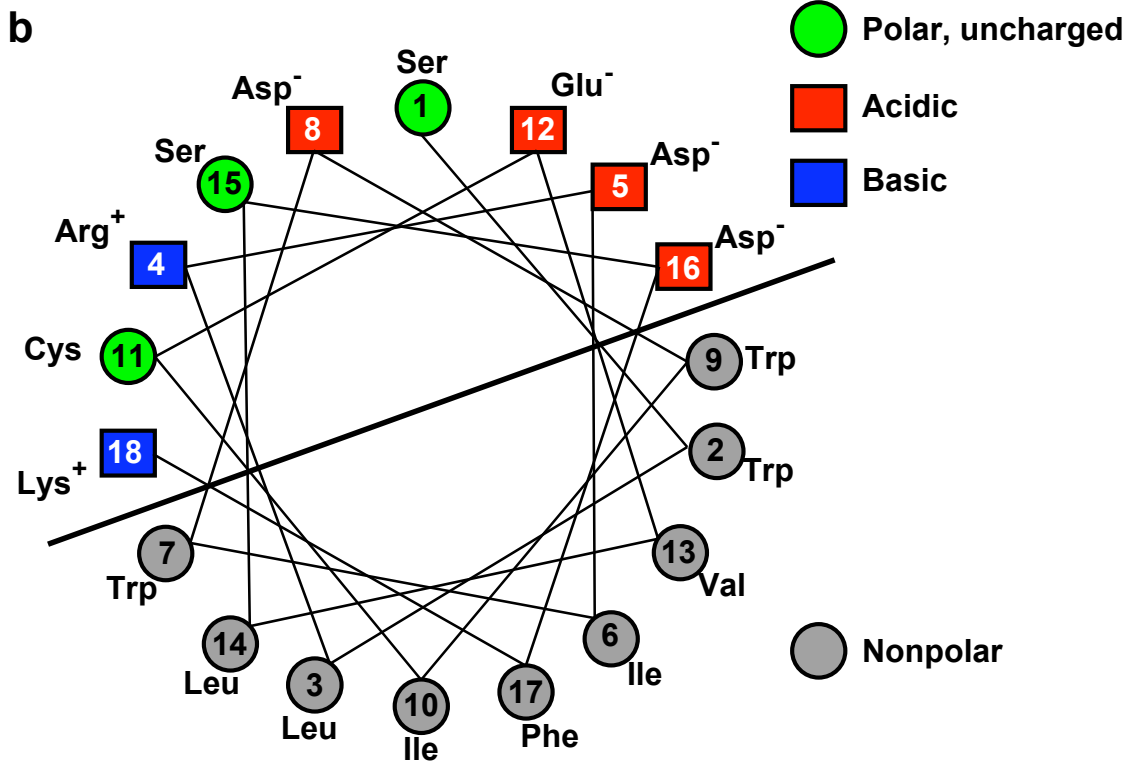

Supplement: pnas_0712380105_2.pdf [file pnas_0712380105_2.pdf]
